# Supplementary material
Source: publisher site journal article supplement (https://www.dovepress.com/article/359360)
Supplement: Supplementary file 1 [file get_supplementary_file.php]

**Appendix: Questionnaire**

**Customer Knowledge Survey**

Thank you for taking the time to complete this survey about customer knowledge hiding. It aims to examine the factors that lead to sales employees’ customer knowledge hiding. The survey should take no more than 15 minutes to complete.

Your responses are confidential. To ensure anonymity, no individual or company will be identifiable in our publications.

Please complete all sections of the survey. You can go back at any time to revise your answers.

**Section I. Demographic information**

1. Your age

| ○21-30 | ○31-35 | ○36-40 | ○41 and above |
| --- | --- | --- | --- |

2. Your education

| ○Associate degree or below | ○Bachelor’s degree | ○Master’s degree | ○Doctorate degree |
| --- | --- | --- | --- |

3. Your nationality

| ○China | ○South Korea |
| --- | --- |

**Section II. How often does your supervisor behave in the following manner towards your coworkers in the same department?**

1-Never; 2-Rarely; 3-Occasionally; 4-Sometimes; 5-Frequently; 6-Usually; 7-Every time

4. My supervisor has ridiculed coworker (s).

| ○1 | ○2 | ○3 | ○4 | ○5 | ○6 | ○7 |
| --- | --- | --- | --- | --- | --- | --- |

5. My supervisor has called my coworker (s) thoughts or feelings of coworker (s) as stupid.

| ○1 | ○2 | ○3 | ○4 | ○5 | ○6 | ○7 |
| --- | --- | --- | --- | --- | --- | --- |

6. My supervisor has put down my coworker (s) in front of others.

| ○1 | ○2 | ○3 | ○4 | ○5 | ○6 | ○7 |
| --- | --- | --- | --- | --- | --- | --- |

7. My supervisor has made negative comments about my coworker (s) to others.

| ○1 | ○2 | ○3 | ○4 | ○5 | ○6 | ○7 |
| --- | --- | --- | --- | --- | --- | --- |

8. My supervisor has told my coworker (s) that (s)he/they is/are incompetent.

| ○1 | ○2 | ○3 | ○4 | ○5 | ○6 | ○7 |
| --- | --- | --- | --- | --- | --- | --- |

**Section III. To what extent do you agree or disagree with the following statements about your coworkers from the same department?**

**1-Strongly disagree; 2-Disagree; 3-Somewhat disagree; 4-Neither agree nor disagree; 5-Somewhat agree; 6-Agree; 7-Strongly agree**

9. I consider coworker (s) as my rival(s) at work.

| ○1 | ○2 | ○3 | ○4 | ○5 | ○6 | ○7 |
| --- | --- | --- | --- | --- | --- | --- |

10. Coworker (s) is/are my rival(s) in terms of performance.

| ○1 | ○2 | ○3 | ○4 | ○5 | ○6 | ○7 |
| --- | --- | --- | --- | --- | --- | --- |

11. Coworker (s) are my competitor(s) for promotion(s).

| ○1 | ○2 | ○3 | ○4 | ○5 | ○6 | ○7 |
| --- | --- | --- | --- | --- | --- | --- |

12. I feel satisfied with the way my supervisor has treated coworker (s) from the same department.

| ○1 | ○2 | ○3 | ○4 | ○5 | ○6 | ○7 |
| --- | --- | --- | --- | --- | --- | --- |

13. I feel relieved with the way my supervisor treated coworker (s).

| ○1 | ○2 | ○3 | ○4 | ○5 | ○6 | ○7 |
| --- | --- | --- | --- | --- | --- | --- |

14. I feel happy with the way my supervisor treated coworker (s).

| ○1 | ○2 | ○3 | ○4 | ○5 | ○6 | ○7 |
| --- | --- | --- | --- | --- | --- | --- |

15. I feel schadenfreude with the way my supervisor treated coworker (s).

| ○1 | ○2 | ○3 | ○4 | ○5 | ○6 | ○7 |
| --- | --- | --- | --- | --- | --- | --- |

**Section IV. How often do you behave in the following manner towards your coworker (s) from the same department?**

**1-Never; 2-Rarely; 3-Occasionally; 4-Sometimes; 5-Frequently; 6-Usually; 7-Every time**

16. I agreed to help coworker (s) with customer-related issues but never really intended to.

| ○1 | ○2 | ○3 | ○4 | ○5 | ○6 | ○7 |
| --- | --- | --- | --- | --- | --- | --- |

17. I agreed to help coworker (s) but instead gave him(her)/them customer information different from what (s)he/they wanted.

| ○1 | ○2 | ○3 | ○4 | ○5 | ○6 | ○7 |
| --- | --- | --- | --- | --- | --- | --- |

18. I told coworker (s) that I would help him(her)/them out later but stalled as much as possible.

| ○1 | ○2 | ○3 | ○4 | ○5 | ○6 | ○7 |
| --- | --- | --- | --- | --- | --- | --- |

19. I offered coworker (s) some other customer information instead of what (s)he/they really wanted

| ○1 | ○2 | ○3 | ○4 | ○5 | ○6 | ○7 |
| --- | --- | --- | --- | --- | --- | --- |

20. I pretended that I did not know the customer-related information.

| ○1 | ○2 | ○3 | ○4 | ○5 | ○6 | ○7 |
| --- | --- | --- | --- | --- | --- | --- |

21. I said that I did not know anything about specific customers even though I did.

| ○1 | ○2 | ○3 | ○4 | ○5 | ○6 | ○7 |
| --- | --- | --- | --- | --- | --- | --- |

22. I pretended I did not know what (s)he/they was (were) talking about.

| ○1 | ○2 | ○3 | ○4 | ○5 | ○6 | ○7 |
| --- | --- | --- | --- | --- | --- | --- |

23. I said that I was not very knowledgeable about topics related to customers.

| ○1 | ○2 | ○3 | ○4 | ○5 | ○6 | ○7 |
| --- | --- | --- | --- | --- | --- | --- |

24. I explained that I would like to tell coworkers about customer-related information but was not supposed to.

| ○1 | ○2 | ○3 | ○4 | ○5 | ○6 | ○7 |
| --- | --- | --- | --- | --- | --- | --- |

25. I explained that the information is confidential and only available to coworkers on a particular project.

| ○1 | ○2 | ○3 | ○4 | ○5 | ○6 | ○7 |
| --- | --- | --- | --- | --- | --- | --- |

26. I told coworker (s) that my supervisor would not let anyone share such customer-related knowledge.

| ○1 | ○2 | ○3 | ○4 | ○5 | ○6 | ○7 |
| --- | --- | --- | --- | --- | --- | --- |

27. I said that I would not answer the questions from coworker (s).

| ○1 | ○2 | ○3 | ○4 | ○5 | ○6 | ○7 |
| --- | --- | --- | --- | --- | --- | --- |

28. Are there any other comments you would like to make about your responses or the survey in general?

_________________________________

**This is the end of the questionnaire.**

**Thanks for your support!**
